# Supplementary material for: Pharmaceutical Micropollutant Treatment with UV–LED/TiO2 Photocatalysis under Various Lighting and Matrix Conditions
Source: MDPI journal article supplement (doi:10.3390/photochem2030035), 2022-07-01
Supplement: s1 [file s1]

**Table S1.** Optimized MS/MS parameters and detection limits for target compounds.

| Compound                    | IDL ( $\mu\text{g/L}$ ) <sup>a</sup> | Q1    | Q3    | Polarity | DP    | EP   | CEP    | CE    | CXP  |
|-----------------------------|--------------------------------------|-------|-------|----------|-------|------|--------|-------|------|
| Atenolol                    | 2                                    | 267.2 | 145.1 | +        | 51    | 3    | 30.00  | 36    | 5    |
| Atorvastatin                | 8                                    | 559.3 | 440.2 | +        | 83    | 5.9  | 18.91  | 32    | 22   |
| Atrazine                    | 1                                    | 216.0 | 174.3 | +        | 66.9  | 3.8  | 13.5   | 27.0  | 2.4  |
| Carbamazepine               | 1                                    | 216.2 | 174.3 | +        | 55    | 4.9  | 14.3   | 51    | 2.7  |
| Diclofenac                  | 1                                    | 293.9 | 250.0 | −        | -46.0 | -2.5 | -22.53 | -15.0 | -1.7 |
| 10,11 epoxide carbamazepine | 1                                    | 253.2 | 180.3 | +        | 26    | 3.5  | 20     | 34    | 5    |
| Fluoxetine                  | 3                                    | 310.3 | 44.3  | +        | 48    | 2.9  | 12.08  | 44    | 7    |
| Gemfibrozil                 | 1                                    | 249.1 | 121.1 | −        | -55.0 | -2.0 | -20.87 | -17.0 | -3.0 |
| Ibuprofen                   | 2                                    | 204.9 | 160.9 | −        | -41   | -2.6 | -19.24 | -11   | -0.5 |
| Naproxen                    | 3                                    | 229.0 | 170.0 | −        | -29   | -1.9 | -20.13 | -25   | -3.8 |
| Norfluoxetine               | 10                                   | 296.1 | 134.1 | +        | 23    | 3    | 9.5    | 9     | 5    |
| o-hydroxy atorvastatin      | 10                                   | 575.2 | 440.3 | +        | 64    | 4    | 19     | 32    | 5    |
| p-hydroxy atorvastatin      | 10                                   | 575.2 | 440.3 | +        | 64    | 4    | 19     | 32    | 5    |
| Sulfamethoxazole            | 1                                    | 254.1 | 156.2 | +        | 41    | 3    | 9.00   | 22.1  | 3    |
| Triclocarban                | 4                                    | 314.8 | 161.6 | −        | -50   | -3   | -12    | -20   | -13  |
| Triclosan                   | 10                                   | 286.9 | 35.0  | −        | -33   | -2   | -7     | -30   | -3   |
| Trimethoprim                | 0.5                                  | 291.1 | 261.2 | +        | 59.0  | 4.0  | 12.00  | 32.0  | 3.0  |
| Venlafaxine                 | 1                                    | 278.3 | 58.1  | +        | 38.2  | 2.9  | 21.00  | 42    | 8    |

<sup>a</sup> the samples were consequently concentrated via solvent evaporation and reconstitution at the IDLs (the concentration factor is 25)

**Table S2.** Optimized MS/MS parameters for deuterated standards.

| Deuterated standards                          | Q1      | Q3      | Polarity | DP    | EP   | CEP     | CE    | CXP  |
|-----------------------------------------------|---------|---------|----------|-------|------|---------|-------|------|
| carbamazepine- d <sub>5</sub>                 | 247.200 | 204.400 | +        | 60.9  | 4.3  | 17.07   | 28.0  | 3.3  |
| venlafaxine- d <sub>6</sub>                   | 284.271 | 64.100  | +        | 44.8  | 3.3  | 18.22   | 45.0  | 2.4  |
| fluoxetine- d <sub>5</sub>                    | 315.200 | 44.200  | +        | 50.0  | 4.0  | 18.97   | 38.2  | 3.1  |
| atenolol- d <sub>7</sub>                      | 274.300 | 145.200 | +        | 49.8  | 3.7  | 41.40   | 35.6  | 3.7  |
| sulfamethoxazole- d <sub>4</sub>              | 258.122 | 160.100 | +        | 54.0  | 4.0  | 25.00   | 37.0  | 3.0  |
| ibuprofen- d <sub>3</sub>                     | 207.900 | 164.100 | –        | -24.1 | -7.6 | -19.35  | -10.0 | -3.0 |
| atorvastatin- d <sub>5</sub>                  | 564.300 | 445.300 | +        | 45.6  | 4.0  | 25.94   | 30.0  | 16.0 |
| naproxen- d <sub>3</sub>                      | 233.000 | 16.900  | –        | -36.8 | -2.0 | -20.28  | -25.7 | -1.0 |
| triclosan- d <sub>3</sub>                     | 289.900 | 35.000  | –        | -28.5 | -2.0 | -11.31  | -25.3 | -2.3 |
| triclocarban- d <sub>4</sub>                  | 316.900 | 159.900 | –        | -50.0 | -2.5 | -23.38  | -18.0 | -2.0 |
| 10,11 epoxide carbamazepine - d <sub>10</sub> | 263.200 | 190.300 | +        | 53.0  | 3.5  | 20.00   | 34.0  | 5.0  |
| norfluoxetine- d <sub>5</sub>                 | 301.200 | 139.200 | +        | 23.0  | 3.0  | 10.00   | 9.0   | 5.0  |
| p-hydroxtatorvastatin- d <sub>5</sub>         | 580.200 | 445.200 | +        | 64.0  | 4.0  | 19.00   | 32.0  | 5.0  |
| o-hydroxtatorvastatin- d <sub>5</sub>         | 580.200 | 445.200 | +        | 64.0  | 4.0  | 19.00   | 32.0  | 5.0  |
| emfibrozil- d <sub>6</sub>                    | 255     | 120.7   | –        | -46.5 | -11  | -21.091 | -19.2 | -2   |
| norfluoxetine- d <sub>5</sub>                 | 301.2   | 139.2   | +        | 10    | 10   | 9       | 9     | 5    |
| diclofenac- d <sub>4</sub>                    | 298.2   | 253.8   | –        | -25.8 | -6.9 | -22.689 | -16.9 | -6.1 |
| trimethoprim- d <sub>3</sub>                  | 294.2   | 230.3   | +        | 22    | 22   | 31      | 31    | 6    |

**Table S3.** Ionization parameters for LC-MS/MS

| Ionization parameters | Positive | Negative |
|-----------------------|----------|----------|
| Curtain Gas (psig)    | 30       | 10       |
| Collision Gas (psig)  | Medium   | Medium   |
| Ion Spray Voltage     | 5500     | -4500    |
| Temperature (°C)      | 750      | 750      |
| Ion Source Gas 1      | 50       | 60       |
| Ion Source Gas 2      | 30       | 40       |

**Table S4.** Chromatographic parameters for LC-MS/MS

| Chromatographic parameters |                                |
|----------------------------|--------------------------------|
| Injection volume (μL)      | 20                             |
| Solvent A                  | 5 mM ammonium acetate in water |
| Solvent B                  | methanol                       |
| Flow rate (mL/min)         | 0.8                            |

**Table S5.** Mobile phase gradient for LC-MS/MS

| Positive mode |     | Negative mode |     |
|---------------|-----|---------------|-----|
| Time (min)    | % B | Time (min)    | % B |
| 0             | 10  | 0             | 10  |
| 0.5           | 10  | 0.5           | 10  |
| 0.51          | 50  | 0.51          | 40  |
| 8             | 100 | 8             | 100 |
| 10            | 100 | 11            | 100 |
| 10.01         | 10  | 11.5          | 10  |
| 15.01         | 10  | 16            | 10  |

**Table S6.** Individual and cumulative kinetic rates for reactions spiked with methanol.

| Compound | 0% Methanol                         |                |                       | 0.002% Methanol                     |                |                       | 0.02% Methanol                      |                |                       | 0.2% Methanol                       |                |                       |
|----------|-------------------------------------|----------------|-----------------------|-------------------------------------|----------------|-----------------------|-------------------------------------|----------------|-----------------------|-------------------------------------|----------------|-----------------------|
|          | $ K_{app} $<br>(min <sup>-1</sup> ) | R <sup>2</sup> | Standard<br>deviation | $ K_{app} $<br>(min <sup>-1</sup> ) | R <sup>2</sup> | Standard<br>deviation | $ K_{app} $<br>(min <sup>-1</sup> ) | R <sup>2</sup> | Standard<br>deviation | $ K_{app} $<br>(min <sup>-1</sup> ) | R <sup>2</sup> | Standard<br>deviation |
| IBU      | 0.0188                              | 0.9173         | 0.0010                | 0.0228                              | 0.9261         | 0.0017                | 0.0156                              | 0.9391         | 0.0027                | 0.0114                              | 0.0042         | 0.9870                |
| NPX      | 0.0325                              | 0.8606         | 0.0013                | 0.0373                              | 0.7946         | 0.0031                | 0.0341                              | 0.9339         | 0.0062                | 0.0333                              | 0.0100         | 0.9705                |
| GFZ      | 0.0302                              | 0.8216         | 0.0036                | 0.0297                              | 0.8917         | 0.0010                | 0.0194                              | 0.9429         | 0.0037                | 0.0128                              | 0.0062         | 0.9878                |
| DCF      | 0.0149                              | 0.8792         | 0.0021                | 0.0160                              | 0.9156         | 0.0025                | 0.0195                              | 0.9005         | 0.0006                | 0.0362                              | 0.0048         | 0.9104                |
| TCS      | 0.0203                              | 0.7344         | 0.0175                | 0.0075                              | 0.8678         | 0.0102                | 0.0110                              | 0.9427         | 0.0018                | 0.0123                              | 0.0015         | 0.9982                |
| TCCB     | 0.0195                              | 0.9366         | 0.0035                | 0.0143                              | 0.9276         | 0.0041                | 0.0060                              | 0.9579         | 0.0014                | 0.0077                              | 0.0002         | 0.9720                |
| ATRZ     | 0.0036                              | 0.8330         | 0.0014                | 0.0021                              | 0.9094         | 0.0007                | 0.0001                              | 0.1504         | 0.0001                | 0.0003                              | 0.0003         | 0.0971                |
| CBZ      | 0.0138                              | 0.9507         | 0.0039                | 0.0079                              | 0.9496         | 0.0026                | 0.0014                              | 0.8830         | 0.0004                | 0.0006                              | 0.0007         | 0.4879                |
| FLX      | 0.0102                              | 0.9460         | 0.0028                | 0.0074                              | 0.9616         | 0.0020                | 0.0026                              | 0.9363         | 0.0007                | 0.0041                              | 0.0031         | 0.8958                |
| ATOR     | 0.0270                              | 0.7010         | 0.0110                | 0.0240                              | 0.8606         | 0.0042                | 0.0140                              | 0.9673         | 0.0048                | 0.0395                              | 0.0047         | 0.7533                |
| VEN      | 0.0098                              | 0.9221         | 0.0034                | 0.0059                              | 0.9018         | 0.0015                | 0.0012                              | 0.8670         | 0.0003                | 0.0003                              | 0.0002         | 0.2100                |
| SULF     | 0.0290                              | 0.9283         | 0.0043                | 0.0277                              | 0.9466         | 0.0049                | 0.0084                              | 0.9283         | 0.0023                | 0.0040                              | 0.0009         | 0.9275                |
| TRIM     | 0.0104                              | 0.9199         | 0.0030                | 0.0065                              | 0.9365         | 0.0011                | 0.0015                              | 0.5038         | 0.0012                | 0.0010                              | 0.0003         | 0.3893                |
| NFLX     | 0.0084                              | 0.9197         | 0.0026                | 0.0072                              | 0.9614         | 0.0011                | 0.0038                              | 0.9455         | 0.0010                | 0.0039                              | 0.0042         | 0.6284                |
| ATEN     | 0.0068                              | 0.9326         | 0.0016                | 0.0039                              | 0.9289         | 0.0015                | 0.0003                              | 0.2185         | 0.0006                | 0.0004                              | 0.0011         | 0.6730                |
| e-CBZ    | 0.0098                              | 0.9289         | 0.0035                | 0.0058                              | 0.9462         | 0.0020                | 0.0008                              | 0.5839         | 0.0006                | 0.0002                              | 0.0004         | 0.1225                |
| p-ATOR   | 0.0293                              | 0.8237         | 0.0056                | 0.0243                              | 0.7858         | 0.0032                | 0.0029                              | 0.9523         | 0.0004                | 0.0640                              | 0.0262         | 0.6343                |
| o-ATOR   | 0.0284                              | 0.7651         | 0.0032                | 0.0216                              | 0.7123         | 0.0022                | 0.0048                              | 1.0000         | 0.0030                | 0.0442                              | 0.0093         | 0.6108                |
| total    | 0.0116                              | 0.9665         | 0.0024                | 0.0087                              | 0.9752         | 0.0014                | 0.0038                              | 0.9471         | 0.0012                | 0.0039                              | 0.9576         | 0.0005                |

**Table S7. Tukey's means comparison test at the  $\alpha = 0.05$  significance level for PPCPs treated under UV light at varying methanol concentrations.**

| Compound |                           | 0.002% vs 0% | 0.02% vs 0% | 0.02% vs 0.002% | 0.2% vs 0% | 0.2% vs 0.002% | 0.2% vs 0.02% |
|----------|---------------------------|--------------|-------------|-----------------|------------|----------------|---------------|
| IBU      | p-value                   | 0.3217       | 0.5121      | 0.0446          | 0.0384     | 0.0035         | 0.2812        |
|          | Significance <sup>a</sup> | 0            | 0           | 1               | 1          | 1              | 0             |
| NPX      | p-value                   | 0.7852       | 0.9895      | 0.9174          | 0.9987     | 0.8575         | 0.9986        |
|          | Significance <sup>a</sup> | 0            | 0           | 0               | 0          | 0              | 0             |
| GFZ      | p-value                   | 0.9985       | 0.0452      | 0.0564          | 0.0034     | 0.0042         | 0.2734        |
|          | Significance <sup>a</sup> | 0            | 1           | 0               | 1          | 1              | 0             |
| DCF      | p-value                   | 0.9625       | 0.2886      | 0.5033          | 0.0001     | 0.0001         | 0.0005        |
|          | Significance <sup>a</sup> | 0            | 0           | 0               | 1          | 1              | 1             |
| TCS      | p-value                   | 0.4563       | 0.6843      | 0.9736          | 0.7716     | 0.9352         | 0.9984        |
|          | Significance <sup>a</sup> | 0            | 0           | 0               | 0          | 0              | 0             |
| TCCB     | p-value                   | 0.1787       | 0.0015      | 0.0265          | 0.0037     | 0.0779         | 0.8658        |
|          | Significance <sup>a</sup> | 0            | 1           | 1               | 1          | 0              | 0             |
| ATRZ     | p-value                   | 0.2330       | 0.0028      | 0.0416          | 0.0021     | 0.0302         | 0.9953        |
|          | Significance <sup>a</sup> | 0            | 1           | 1               | 1          | 1              | 0             |
| CBZ      | p-value                   | 0.0670       | 0.0010      | 0.0415          | 0.0007     | 0.0234         | 0.9745        |
|          | Significance <sup>a</sup> | 0            | 1           | 1               | 1          | 1              | 0             |
| FLX      | p-value                   | 1.0000       | 1.0000      | 1.0000          | 0.5115     | 0.5185         | 0.5302        |
|          | Significance <sup>a</sup> | 0            | 0           | 0               | 0          | 0              | 0             |
| ATOR     | p-value                   | 0.9417       | 0.1622      | 0.3372          | 0.1901     | 0.0875         | 0.0075        |
|          | Significance <sup>a</sup> | 0            | 0           | 0               | 0          | 0              | 1             |
| VEN      | p-value                   | 0.1269       | 0.0023      | 0.0613          | 0.0013     | 0.0294         | 0.9506        |
|          | Significance <sup>a</sup> | 0            | 1           | 0               | 1          | 1              | 0             |
| SULF     | p-value                   | 0.9719       | 0.0004      | 0.0006          | 0.0001     | 0.0001         | 0.4635        |
|          | Significance <sup>a</sup> | 0            | 1           | 1               | 1          | 1              | 0             |
| TRIM     | p-value                   | 0.0846       | 0.0009      | 0.0287          | 0.0007     | 0.0183         | 0.9867        |
|          | Significance <sup>a</sup> | 0            | 1           | 1               | 1          | 1              | 0             |
| NFLX     | p-value                   | 0.9428       | 0.2035      | 0.4092          | 0.2193     | 0.4360         | 0.9999        |
|          | Significance <sup>a</sup> | 0            | 0           | 0               | 0          | 0              | 0             |
| ATEN     | p-value                   | 0.0821       | 0.0010      | 0.0314          | 0.0010     | 0.0336         | 1.0000        |
|          | Significance <sup>a</sup> | 0            | 1           | 1               | 1          | 1              | 0             |
| e-CBZ    | p-value                   | 0.1544       | 0.0028      | 0.0636          | 0.0018     | 0.0375         | 0.9807        |
|          | Significance <sup>a</sup> | 0            | 1           | 0               | 1          | 1              | 0             |
| p-ATOR   | p-value                   | 0.9325       | 0.0666      | 0.1441          | 0.0332     | 0.0174         | 0.0016        |
|          | Significance <sup>a</sup> | 0            | 0           | 0               | 1          | 1              | 1             |
| o-ATOR   | p-value                   | 0.4392       | 0.0026      | 0.0189          | 0.0263     | 0.0034         | 0.0001        |
|          | Significance <sup>a</sup> | 0            | 1           | 1               | 1          | 1              | 1             |
| total    | p-value                   | 0.1688       | 0.0011      | 0.0183          | 0.0012     | 0.0204         | 0.9998        |
|          | Significance <sup>a</sup> | 0            | 1           | 1               | 1          | 1              | 0             |

**Note:** <sup>a</sup> A significance of 1 means the values compared are significantly different

Table S8. Tukey's means comparison test at the  $\alpha = 0.05$  significance level for PPCPs treated under continuous and dual frequency lighting.

| Compound | p-value | Significance <sup>a</sup> |
|----------|---------|---------------------------|
| ATEN     | 0.3963  | 0                         |
| ATOR     | 0.0180  | 1                         |
| ATRZ     | 0.3023  | 0                         |
| CBZ      | 0.0899  | 0                         |
| DCF      | 0.3918  | 0                         |
| e-CBZ    | 0.7346  | 0                         |
| FLX      | 0.2458  | 0                         |
| GFZ      | 0.1453  | 0                         |
| IBU      | 0.3227  | 0                         |
| NFLX     | 0.0596  | 0                         |
| NPX      | 0.8685  | 0                         |
| o-ATOR   | 0.5542  | 0                         |
| p-ATOR   | 0.8455  | 0                         |
| SULF     | 0.1178  | 0                         |
| TCCB     | 0.0203  | 1                         |
| TCS      | 0.0321  | 1                         |
| TRIM     | 0.3874  | 0                         |
| VEN      | 0.9304  | 0                         |
| total    | 0.3874  | 0                         |

Note: <sup>a</sup> A significance of 1 means the values compared are significantly different

**Table S9.** Individual and cumulative kinetic rates for reactions under continuous UV at varying pH.

| Compound | pH 3                                |                |                       | pH 5                                |                |                       | pH 10                               |                |                       |
|----------|-------------------------------------|----------------|-----------------------|-------------------------------------|----------------|-----------------------|-------------------------------------|----------------|-----------------------|
|          | $ K_{app} $<br>(min <sup>-1</sup> ) | R <sup>2</sup> | Standard<br>deviation | $ K_{app} $<br>(min <sup>-1</sup> ) | R <sup>2</sup> | Standard<br>deviation | $ K_{app} $<br>(min <sup>-1</sup> ) | R <sup>2</sup> | Standard<br>deviation |
| IBU      | 0.0029                              | 0.8194         | 0.0013                | 0.0050                              | 0.9908         | 0.0012                | 0.0009                              | 0.6885         | 0.0002                |
| NPX      | 0.0108                              | 0.9344         | 0.0006                | 0.0150                              | 0.9876         | 0.0029                | 0.0006                              | 0.4586         | 0.0004                |
| GFZ      | 0.0051                              | 0.8962         | 0.0009                | 0.0055                              | 0.9888         | 0.0009                | 0.0002                              | 0.0555         | 0.0006                |
| DCF      | 0.0114                              | 0.9295         | 0.0023                | 0.0175                              | 0.9785         | 0.0023                | 0.0000                              | 0.5085         | 0.0006                |
| TCS      | 0.0017                              | 0.8968         | 0.0002                | 0.0030                              | 0.9906         | 0.0004                | 0.0008                              | 0.5217         | 0.0008                |
| TCCB     | 0.0005                              | 0.4783         | 0.0002                | 0.0011                              | 0.9678         | 0.0002                | 0.0009                              | 0.6885         | 0.0002                |
| ATRZ     | 0.0016                              | 0.2191         | 0.0020                | 0.0001                              | 0.1066         | 0.0003                | 0.0003                              | 0.1508         | 0.0003                |
| CBZ      | 0.0004                              | 0.1775         | 0.0008                | 0.0006                              | 0.8315         | 0.0001                | 0.0001                              | 0.0897         | 0.0002                |
| FLX      | 0.0000                              | -0.0553        | 0.0003                | 0.0003                              | 0.0100         | 0.0002                | 0.0045                              | 0.8721         | 0.0002                |
| ATOR     | 0.0112                              | 0.7345         | 0.0027                | 0.0165                              | 0.9952         | 0.0012                | 0.0002                              | 0.2218         | 0.0009                |
| VEN      | 0.0002                              | 0.4770         | 0.0006                | 0.0001                              | -0.0374        | 0.0001                | 0.0031                              | 0.7933         | 0.0010                |
| SULF     | 0.0031                              | 0.9071         | 0.0010                | 0.0044                              | 0.9961         | 0.0004                | 0.0009                              | 0.4590         | 0.0002                |
| TRIM     | 0.0017                              | 0.5164         | 0.0008                | 0.0013                              | 0.9288         | 0.0004                | 0.0011                              | 0.8731         | 0.0002                |
| NFLX     | 0.0003                              | 0.1152         | 0.0001                | 0.0005                              | 0.2283         | 0.0006                | 0.0041                              | 0.7470         | 0.0006                |
| ATEN     | 0.0002                              | 0.0698         | 0.0006                | 0.0001                              | -0.0043        | 0.0002                | 0.0030                              | 0.6670         | 0.0015                |
| e-CBZ    | 0.0001                              | 0.1077         | 0.0018                | 0.0003                              | 0.4575         | 0.0004                | 0.0000                              | -0.1526        | 0.0001                |
| p-ATOR   | 0.0085                              | 0.6225         | 0.0026                | 0.0185                              | 0.5724         | 0.0077                | 0.0013                              | 0.4121         | 0.0008                |
| o-ATOR   | 0.0085                              | 0.7356         | 0.0010                | 0.0220                              | 0.9730         | 0.0013                | 0.0008                              | 0.3164         | 0.0009                |
| total    | 0.0018                              | 0.9487         | 0.0002                | 0.0025                              | 0.9516         | 0.0004                | 0.0006                              | 0.6665         | 0.0000                |

**Table S10.** Individual and cumulative kinetic rates for PPCPs under dual frequency (50Hz and 0.1Hz) UV light at varying pH.

| Compound | pH 3                                |                |                       | pH 5                                |                |                       | pH 10                               |                |                       |
|----------|-------------------------------------|----------------|-----------------------|-------------------------------------|----------------|-----------------------|-------------------------------------|----------------|-----------------------|
|          | $ K_{app} $<br>(min <sup>-1</sup> ) | R <sup>2</sup> | Standard<br>deviation | $ K_{app} $<br>(min <sup>-1</sup> ) | R <sup>2</sup> | Standard<br>deviation | $ K_{app} $<br>(min <sup>-1</sup> ) | R <sup>2</sup> | Standard<br>deviation |
| IBU      | 0.0031                              | 0.7632         | 0.0019                | 0.0037                              | 0.9362         | 0.0015                | 0.0006                              | 0.6613         | 0.0001                |
| NPX      | 0.0130                              | 0.8704         | 0.0009                | 0.0147                              | 0.9886         | 0.0003                | 0.0008                              | 0.4623         | 0.0006                |
| GFZ      | 0.0086                              | 0.9747         | 0.0027                | 0.0066                              | 0.9836         | 0.0006                | 0.0002                              | 0.5017         | 0.0007                |
| DCF      | 0.0077                              | 0.7650         | 0.0033                | 0.0162                              | 0.9811         | 0.0007                | 0.0003                              | 0.2998         | 0.0006                |
| TCS      | 0.0004                              | 0.0954         | 0.0008                | 0.0021                              | 0.9488         | 0.0002                | 0.0002                              | 0.4065         | 0.0004                |
| TCCB     | 0.0007                              | 0.6756         | 0.0003                | 0.0008                              | 0.9024         | 0.0001                | 0.0006                              | 0.6613         | 0.0001                |
| ATRZ     | 0.0002                              | -0.0204        | 0.0001                | 0.0001                              | -0.1778        | 0.0001                | 0.0003                              | 0.0318         | 0.0005                |
| CBZ      | 0.0008                              | 0.5323         | 0.0005                | 0.0002                              | 0.0787         | 0.0004                | 0.0001                              | 0.3779         | 0.0003                |
| FLX      | 0.0000                              | -0.0366        | 0.0001                | 0.0003                              | 0.4605         | 0.0007                | 0.0050                              | 0.7631         | 0.0006                |
| ATOR     | 0.0087                              | 0.7916         | 0.0010                | 0.0134                              | 0.9776         | 0.0008                | 0.0002                              | 0.6796         | 0.0011                |
| VEN      | 0.0004                              | 0.5041         | 0.0006                | 0.0001                              | -0.1311        | 0.0002                | 0.0033                              | 0.9516         | 0.0007                |
| SULF     | 0.0049                              | 0.8636         | 0.0031                | 0.0039                              | 0.9520         | 0.0002                | 0.0002                              | 0.2775         | 0.0003                |
| TRIM     | 0.0042                              | 0.6686         | 0.0041                | 0.0002                              | -0.0693        | 0.0002                | 0.0001                              | 0.4284         | 0.0005                |
| NFLX     | 0.0005                              | 0.6868         | 0.0001                | 0.0005                              | 0.0658         | 0.0003                | 0.0049                              | 0.6906         | 0.0010                |
| ATEN     | 0.0002                              | 0.4857         | 0.0006                | 0.0004                              | 0.0428         | 0.0005                | 0.0041                              | 0.9557         | 0.0010                |
| e-CBZ    | 0.0008                              | 0.4109         | 0.0010                | 0.0007                              | 0.3803         | 0.0019                | 0.0005                              | 0.5101         | 0.0001                |
| p-ATOR   | 0.0133                              | 0.8737         | 0.0030                | 0.0194                              | 0.9725         | 0.0028                | 0.0001                              | 0.2658         | 0.0008                |
| o-ATOR   | 0.0108                              | 0.7855         | 0.0014                | 0.0205                              | 0.9696         | 0.0036                | 0.0001                              | 0.1757         | 0.0006                |
| total    | 0.0019                              | 0.9523         | 0.0006                | 0.0022                              | 0.9479         | 0.0003                | 0.0003                              | 0.5080         | 0.0004                |



**Table S11.** Tukey's means comparison test for degradation rates of PPCPs at different pH under continuous UV light.

| Compound |                           | pH5 vs pH3 | pH10 vs pH3 | pH10 vs pH5 |
|----------|---------------------------|------------|-------------|-------------|
| IBU      | p-value                   | 0.1059     | 0.1103      | 0.0064      |
|          | Significance <sup>a</sup> | 0          | 0           | 1           |
| NPX      | p-value                   | 0.0577     | 0.0005      | 0.0001      |
|          | Significance <sup>a</sup> | 0          | 1           | 1           |
| GFZ      | p-value                   | 0.7949     | 0.0005      | 0.0003      |
|          | Significance <sup>a</sup> | 0          | 1           | 1           |
| DCF      | p-value                   | 0.019      | 0.001       | 0.000       |
|          | Significance <sup>a</sup> | 1          | 1           | 1           |
| TCS      | p-value                   | 0.0700     | 0.1646      | 0.0063      |
|          | Significance <sup>a</sup> | 0          | 0           | 1           |
| TCCB     | p-value                   | 0.0194     | 0.1070      | 0.3965      |
|          | Significance <sup>a</sup> | 1          | 0           | 0           |
| ATRZ     | p-value                   | 0.2513     | 0.2039      | 0.9847      |
|          | Significance <sup>a</sup> | 0          | 0           | 0           |
| CBZ      | p-value                   | 0.8224     | 0.6341      | 0.3347      |
|          | Significance <sup>a</sup> | 0          | 0           | 0           |
| FLX      | p-value                   | 0.4566     | 0.0000      | 0.0000      |
|          | Significance <sup>a</sup> | 0          | 1           | 1           |
| ATOR     | p-value                   | 0.0244     | 0.0006      | 0.0001      |
|          | Significance <sup>a</sup> | 1          | 1           | 1           |
| VEN      | p-value                   | 0.9807     | 0.0051      | 0.0042      |
|          | Significance <sup>a</sup> | 0          | 1           | 1           |
| SULF     | p-value                   | 0.1047     | 0.0101      | 0.0011      |
|          | Significance <sup>a</sup> | 0          | 1           | 1           |
| TRIM     | p-value                   | 0.7108     | 0.4741      | 0.9041      |
|          | Significance <sup>a</sup> | 0          | 0           | 0           |
| NFLX     | p-value                   | 0.9150     | 0.0001      | 0.0000      |
|          | Significance <sup>a</sup> | 0          | 1           | 1           |
| ATEN     | p-value                   | 0.9930     | 0.0150      | 0.0170      |
|          | Significance <sup>a</sup> | 0          | 1           | 1           |
| e-CBZ    | p-value                   | 0.8451     | 0.9908      | 0.9044      |
|          | Significance <sup>a</sup> | 0          | 0           | 0           |
| p-ATOR   | p-value                   | 0.0917     | 0.2242      | 0.0101      |
|          | Significance <sup>a</sup> | 0          | 0           | 1           |
| o-ATOR   | p-value                   | 0.0000     | 0.0003      | 0.0000      |
|          | Significance <sup>a</sup> | 1          | 1           | 1           |
| total    | p-value                   | 0.0381     | 0.0040      | 0.0003      |
|          | Significance <sup>a</sup> | 1          | 1           | 1           |

Note: <sup>a</sup> A significance of 1 means the values compared are significantly different

**Table S12.** Tukey's means comparison test for degradation rates of PPCPs at different pH under dual frequency UV light.

| Compound |                           | pH5 vs pH3 | pH10 vs pH3 | pH10 vs pH5 |
|----------|---------------------------|------------|-------------|-------------|
| IBU      | p-value                   | 0.8632     | 0.1410      | 0.0725      |
|          | Significance <sup>a</sup> | 0          | 0           | 0           |
| NPX      | p-value                   | 0.0391     | 0.0000      | 0.0000      |
|          | Significance <sup>a</sup> | 1          | 1           | 1           |
| GFZ      | p-value                   | 0.3572     | 0.0018      | 0.0073      |
|          | Significance <sup>a</sup> | 0          | 1           | 1           |
| DCF      | p-value                   | 0.0047     | 0.0064      | 0.0001      |
|          | Significance <sup>a</sup> | 1          | 1           | 1           |
| TCS      | p-value                   | 0.0140     | 0.9147      | 0.0091      |
|          | Significance <sup>a</sup> | 1          | 0           | 1           |
| TCCB     | p-value                   | 0.9677     | 0.6351      | 0.5013      |
|          | Significance <sup>a</sup> | 0          | 0           | 0           |
| ATRZ     | p-value                   | 0.5205     | 0.1926      | 0.6887      |
|          | Significance <sup>a</sup> | 0          | 0           | 0           |
| CBZ      | p-value                   | 0.2542     | 0.0840      | 0.6749      |
|          | Significance <sup>a</sup> | 0          | 0           | 0           |
| FLX      | p-value                   | 0.7852     | 0.0001      | 0.0001      |
|          | Significance <sup>a</sup> | 0          | 1           | 1           |
| ATOR     | p-value                   | 0.0021     | 0.0001      | 0.0000      |
|          | Significance <sup>a</sup> | 1          | 1           | 1           |
| VEN      | p-value                   | 0.4332     | 0.0003      | 0.0008      |
|          | Significance <sup>a</sup> | 0          | 1           | 1           |
| SULF     | p-value                   | 0.7801     | 0.0318      | 0.0737      |
|          | Significance <sup>a</sup> | 0          | 1           | 0           |
| TRIM     | p-value                   | 0.1790     | 0.1762      | 0.9999      |
|          | Significance <sup>a</sup> | 0          | 0           | 0           |
| NFLX     | p-value                   | 0.1839     | 0.0001      | 0.0002      |
|          | Significance <sup>a</sup> | 0          | 1           | 1           |
| ATEN     | p-value                   | 0.9741     | 0.0009      | 0.0008      |
|          | Significance <sup>a</sup> | 0          | 1           | 1           |
| e-CBZ    | p-value                   | 0.3545     | 0.9682      | 0.4652      |
|          | Significance <sup>a</sup> | 0          | 0           | 0           |
| p-ATOR   | p-value                   | 0.0472     | 0.0013      | 0.0002      |
|          | Significance <sup>a</sup> | 1          | 1           | 1           |
| o-ATOR   | p-value                   | 0.0041     | 0.0024      | 0.0001      |
|          | Significance <sup>a</sup> | 1          | 1           | 1           |
| total    | p-value                   | 0.6725     | 0.0131      | 0.0053      |
|          | Significance <sup>a</sup> | 0          | 1           | 1           |

Note: <sup>a</sup> A significance of 1 means the values compared are significantly different

**Table S13.** Linear regression analysis of the degradation rates of PPCPs under continuous and dual frequency light using charge, mass, and solubility.

| Variables                    | R <sup>2</sup> , continuous UV |        |        | R <sup>2</sup> , dual frequency UV |        |        |
|------------------------------|--------------------------------|--------|--------|------------------------------------|--------|--------|
|                              | pH 3                           | pH 5   | pH 10  | pH 3                               | pH 5   | pH 10  |
| Charge                       | 0.4101                         | 0.6275 | 0.2033 | 0.3719                             | 0.6167 | 0.3448 |
| Charge and mass              | 0.5230                         | 0.8238 | 0.3193 | 0.5108                             | 0.8054 | 0.4091 |
| Charge, mass, and solubility | 0.5316                         | 0.8890 | 0.2711 | 0.5763                             | 0.8853 | 0.3711 |

Table S14. Correlation analysis of PPCP degradation rates under continuous and dual frequency lighting with charge, mass, and solubility.

| Dual frequency UV light |          |              |          |         |            | Continuous UV light |              |         |         |            |
|-------------------------|----------|--------------|----------|---------|------------|---------------------|--------------|---------|---------|------------|
| Model                   |          |              | Charge   | Mass    | Solubility | Model               |              | Charge  | Mass    | Solubility |
| pH 5                    | Pearson  | Coefficient  | 0.7995   | -0.7055 | 0.6014     | Pearson             | Coefficient  | 0.8059  | -0.7143 | 0.6224     |
|                         |          | Significance | 0.0001   | 0.0011  | 0.0083     |                     | Significance | 0.0001  | 0.0009  | 0.0058     |
|                         | Spearman | Coefficient  | 0.8813   | -0.3841 | 0.5670     | Spearman            | Coefficient  | 0.9219  | -0.2850 | 0.6249     |
|                         |          | Significance | 0.0000   | 0.1156  | 0.0141     |                     | Significance | 0.0000  | 0.2517  | 0.0056     |
|                         | Kendall  | Coefficient  | 0.7421   | -0.2885 | 0.4305     | Kendall             | Coefficient  | 0.7966  | -0.1705 | 0.4835     |
|                         |          | Significance | 0.0000   | 0.0954  | 0.0135     |                     | Significance | 0.0000  | 0.3244  | 0.0055     |
| pH 10                   | Pearson  | Coefficient  | -0.6192  | 0.1019  | 0.4283     | Pearson             | Coefficient  | -0.5002 | -0.0299 | 0.4125     |
|                         |          | Significance | 0.0062   | 0.6875  | 0.0762     |                     | Significance | 0.0345  | 0.9063  | 0.0889     |
|                         | Spearman | Coefficient  | -0.5797  | -0.1384 | 0.6540     | Spearman            | Coefficient  | -0.4546 | -0.4442 | 0.4541     |
|                         |          | Significance | 0.0117   | 0.5838  | 0.0032     |                     | Significance | 0.0581  | 0.0648  | 0.0584     |
|                         | Kendall  | Coefficient  | -0.4841  | -0.0724 | 0.5128     | Kendall             | Coefficient  | -0.3541 | -0.3355 | 0.3188     |
|                         |          | Significance | 0.0083   | 0.6765  | 0.0042     |                     | Significance | 0.0534  | 0.0531  | 0.0748     |
| pH 3                    | Pearson  | Coefficient  | 0.6394   | -0.5662 | 0.5911     | Pearson             | Coefficient  | 0.6669  | -0.5427 | 0.6370     |
|                         |          | Significance | 0.0043   | 0.0143  | 0.0098     |                     | Significance | 0.0025  | 0.0200  | 0.0045     |
|                         | Spearman | Coefficient  | 0.8179   | -0.2571 | 0.6279     | Spearman            | Coefficient  | 0.8912  | -0.1817 | 0.6736     |
|                         |          | Significance | 0.000034 | 0.3031  | 0.0053     |                     | Significance | 0.0000  | 0.4705  | 0.0022     |
|                         | Kendall  | Coefficient  | 0.6562   | -0.1967 | 0.4550     | Kendall             | Coefficient  | 0.7667  | -0.0787 | 0.4817     |
|                         |          | Significance | 0.0003   | 0.2555  | 0.0095     |                     | Significance | 0.0000  | 0.6492  | 0.0060     |

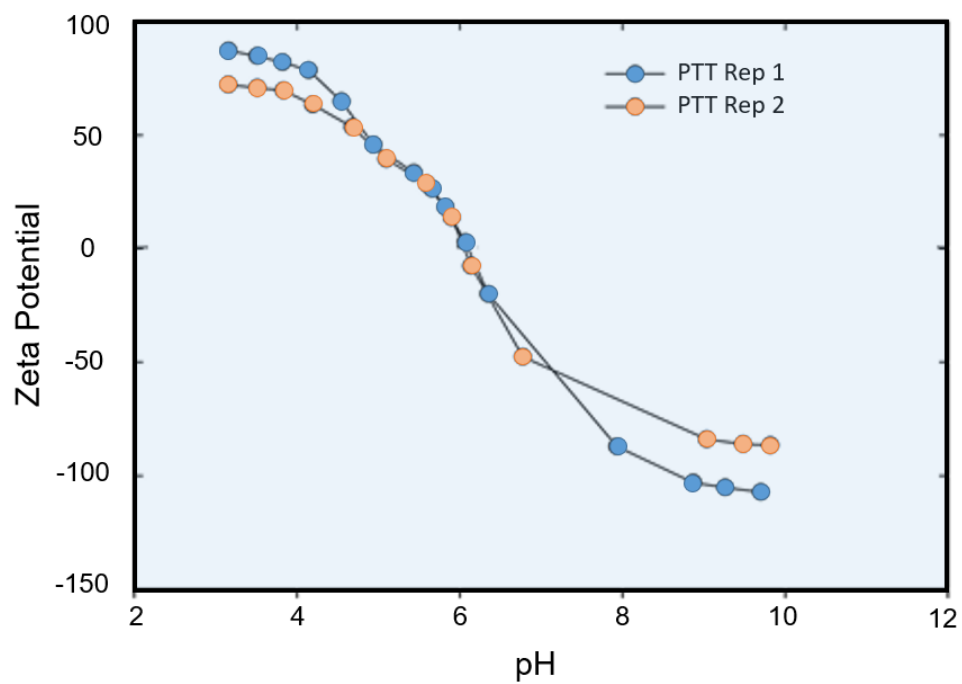

**Figure S1.** Zeta potential readings for PTT. pIEP is the point with a zero-zeta potential (approximately at pH 6).

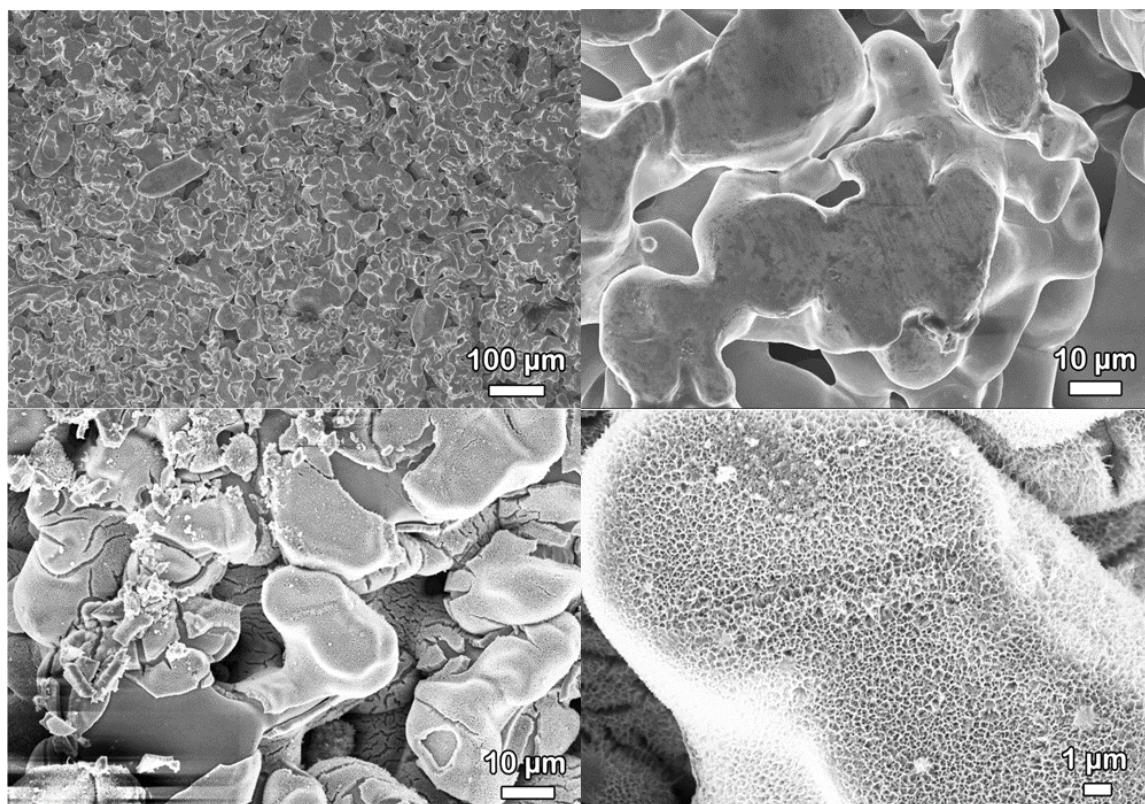

**Figure S2.** High-resolution SEM of the morphology of the membranes at different magnifications.

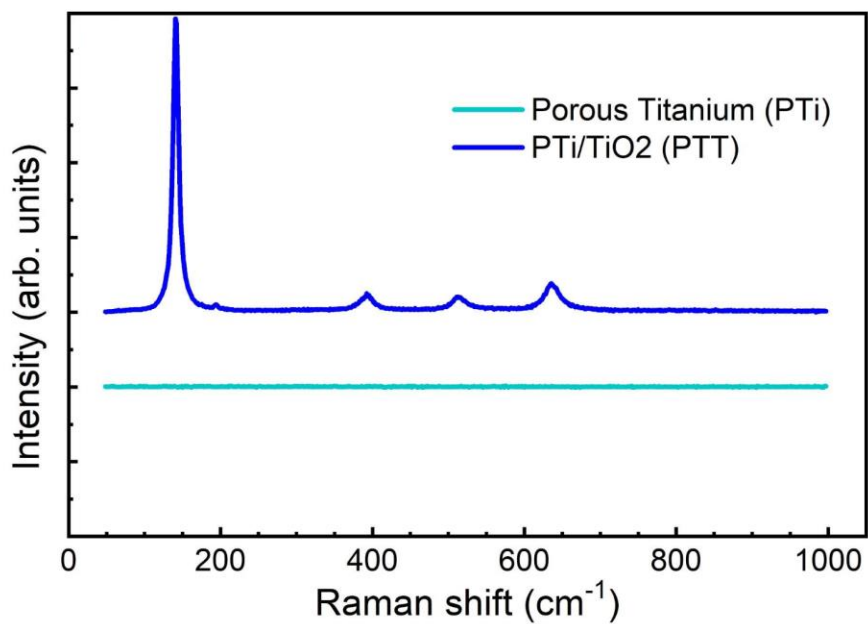

**Figure S3.** Raman characterization at 488 nm of the PTi and PTT samples.

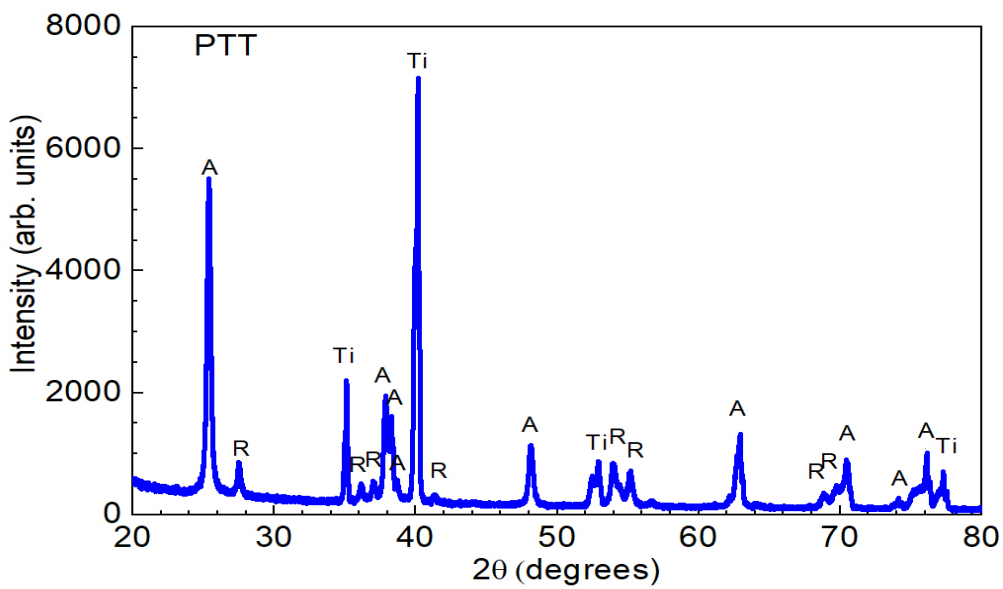

**Figure S4.** X-ray diffraction for the PTT membrane sample.

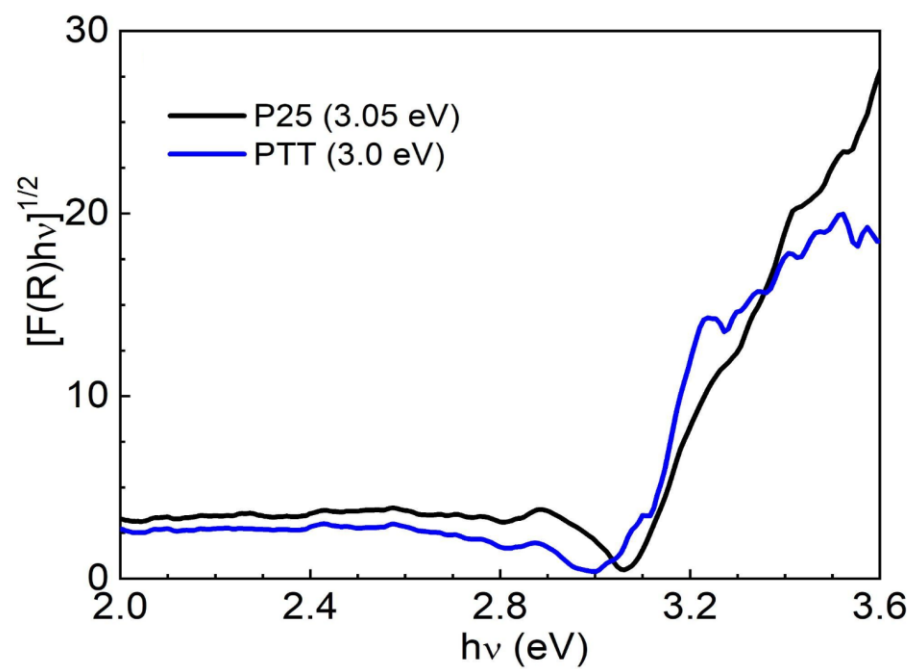

**Figure S5.** Tauc plots for the P25 and PTT samples.

Linear Fit at different light exposures and pHs

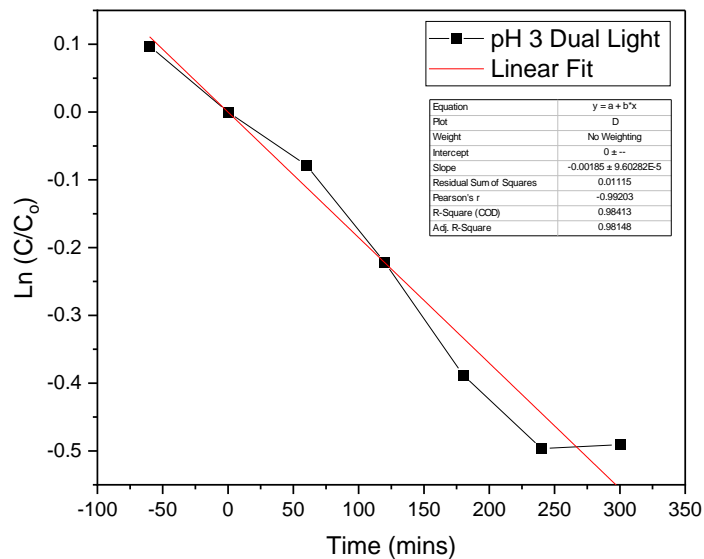

Figure S6. pH3 Dual light linear fit

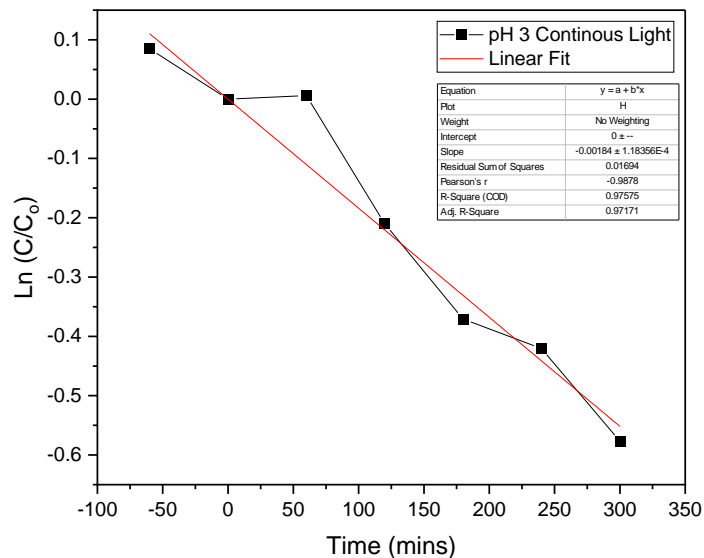

Figure S7. pH3 Continuous light linear fit



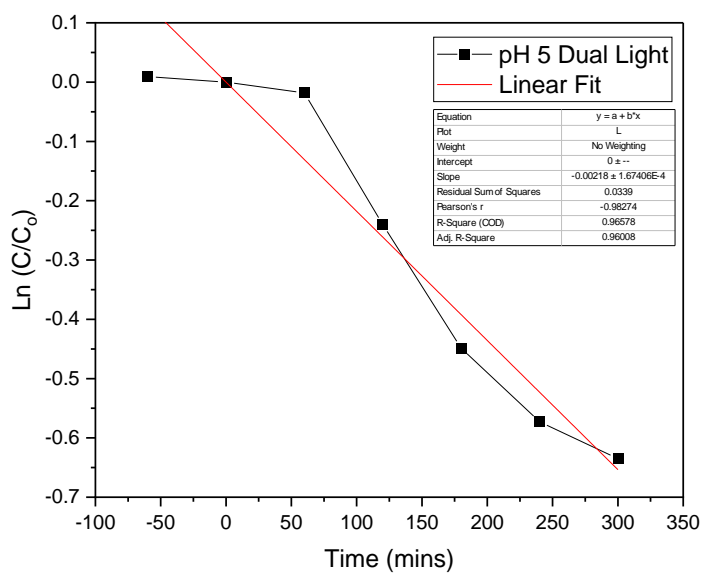

**Figure S8.** pH5 Dual light linear fit

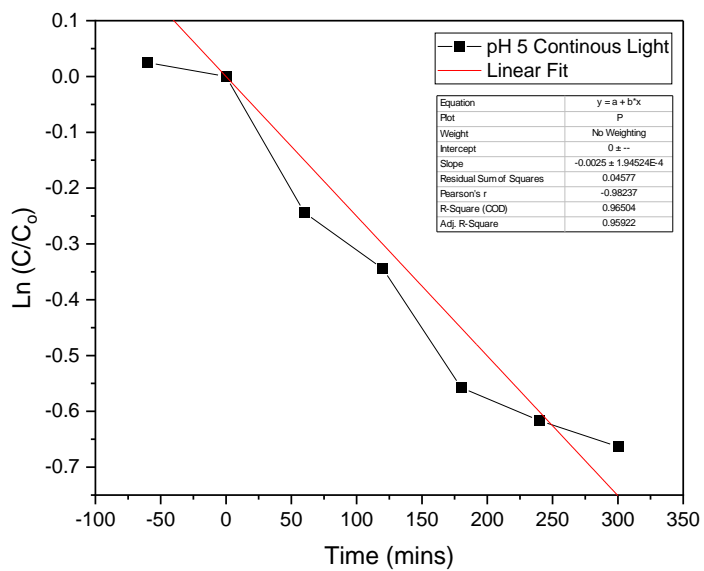

**Figure S9.** pH5 Continuous light linear fit

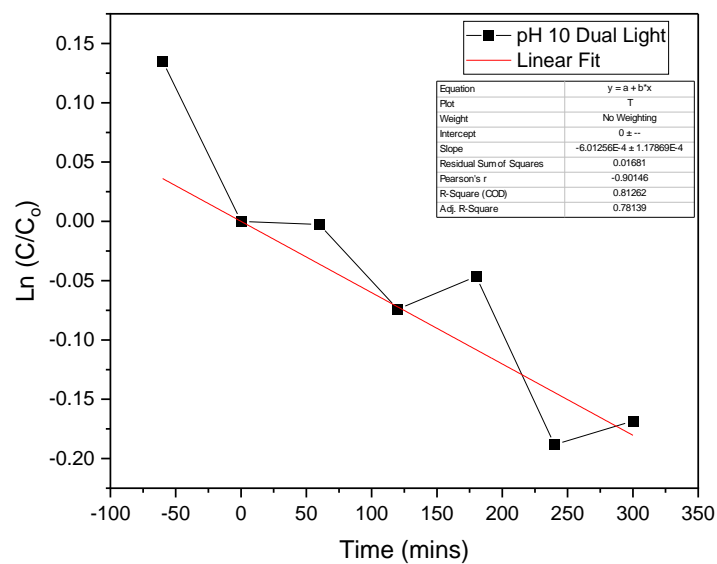

**Figure S10.** pH10 Dual light linear fit

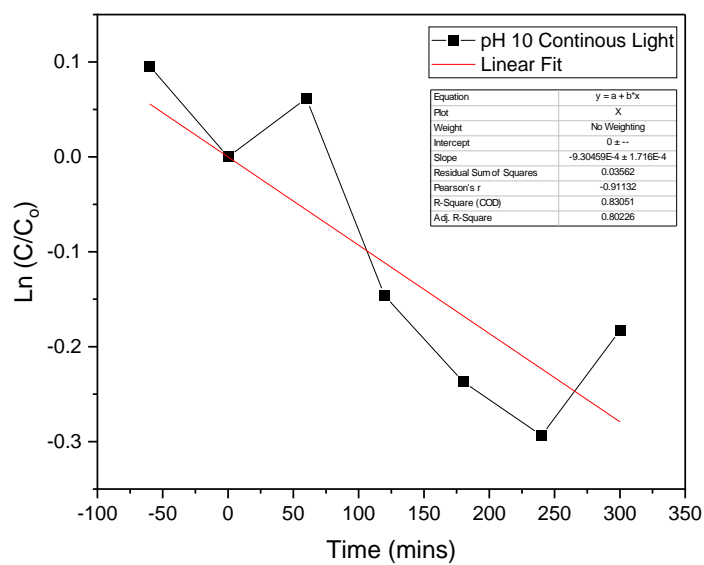

**Figure S11.** pH10 Continuous light linear fit

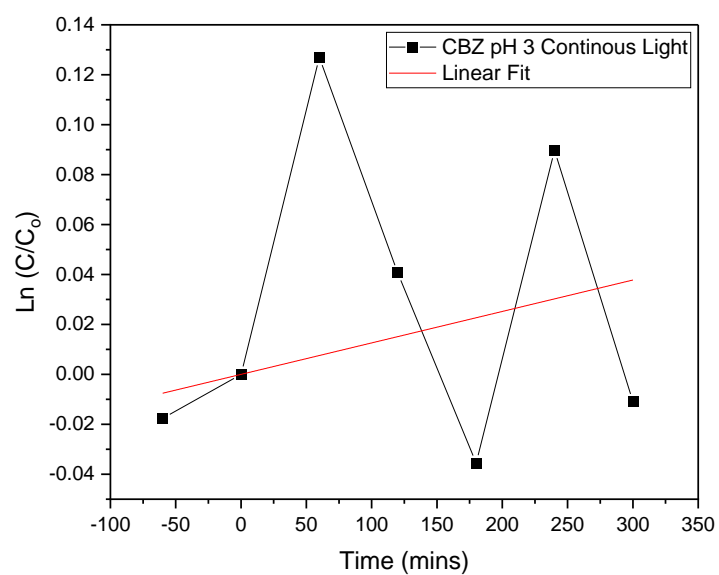

**Figure S12.** pH 3 Continuous light for CBZ sample linear fit

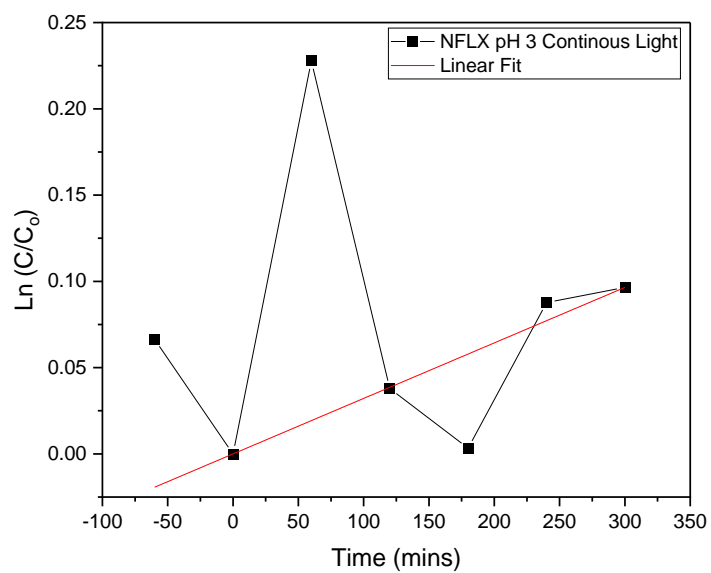

**Figure S13.** pH 3 Continuous light for NFLX sample linear fit

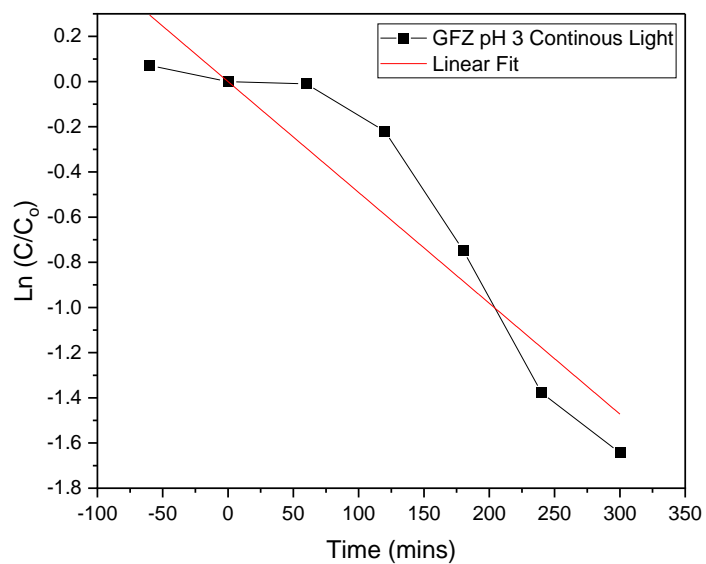

**Figure S14.** pH 3 Continuous light for GFZ sample linear fit

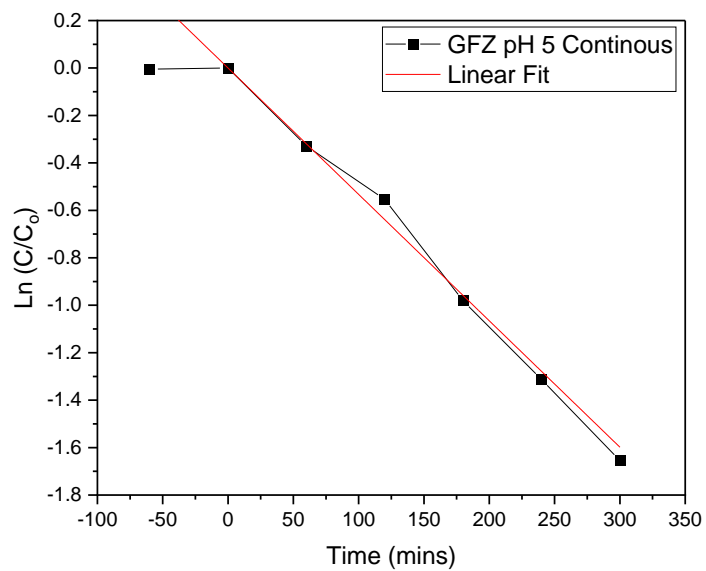

**Figure S15.** pH 5 Continuous light for GFZ sample linear fit

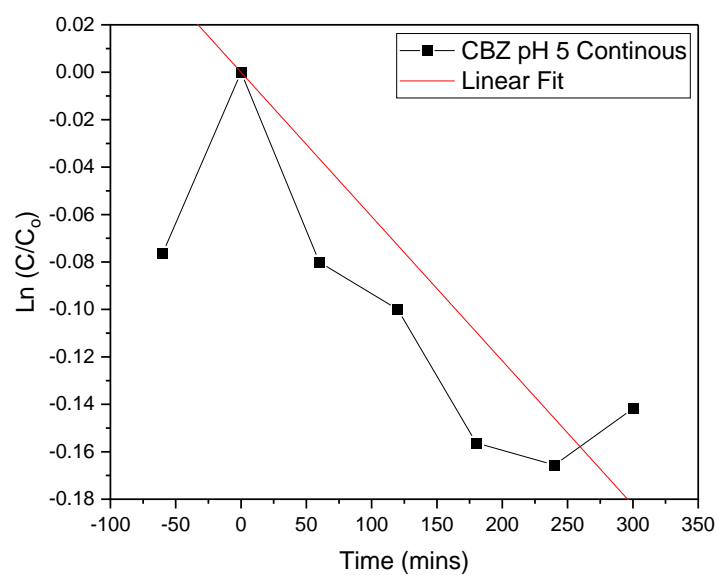

**Figure S16.** pH 5 Continuous light for CBZ sample linear fit

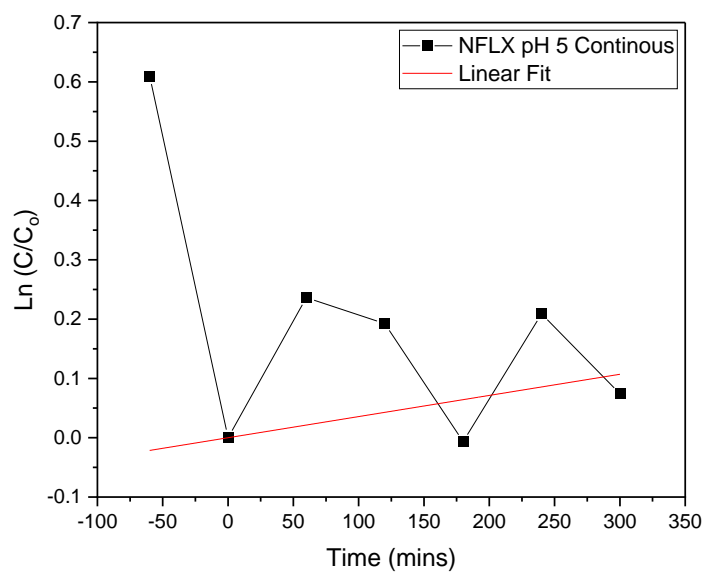

**Figure S17.** pH 5 Continuous light for NFLX sample linear fit

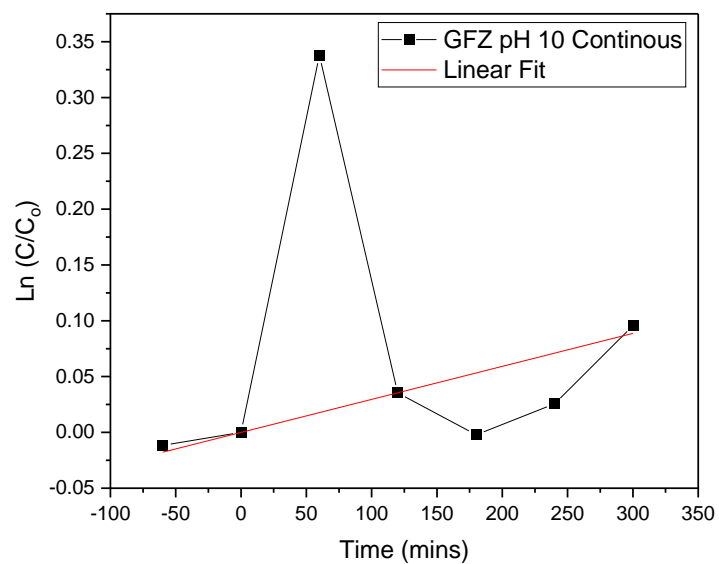

**Figure S18.** pH 10 Continuous light for GFZ sample linear fit

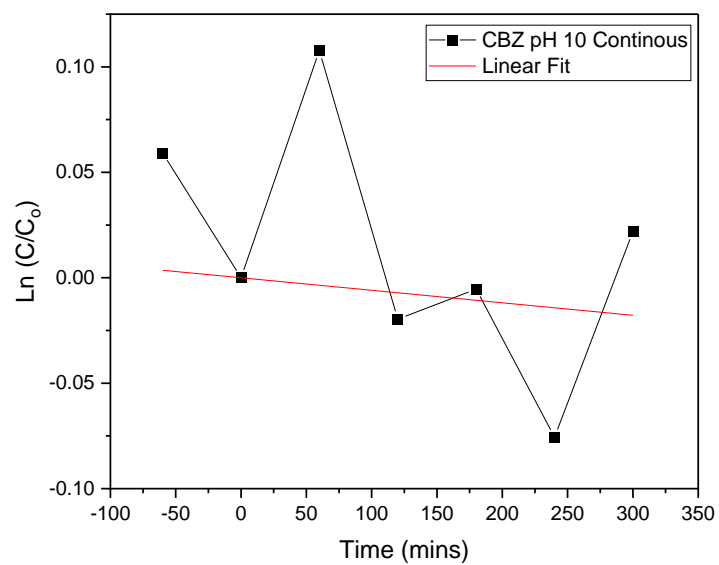

**Figure S19.** pH 10 Continuous light for CBZ sample linear fit

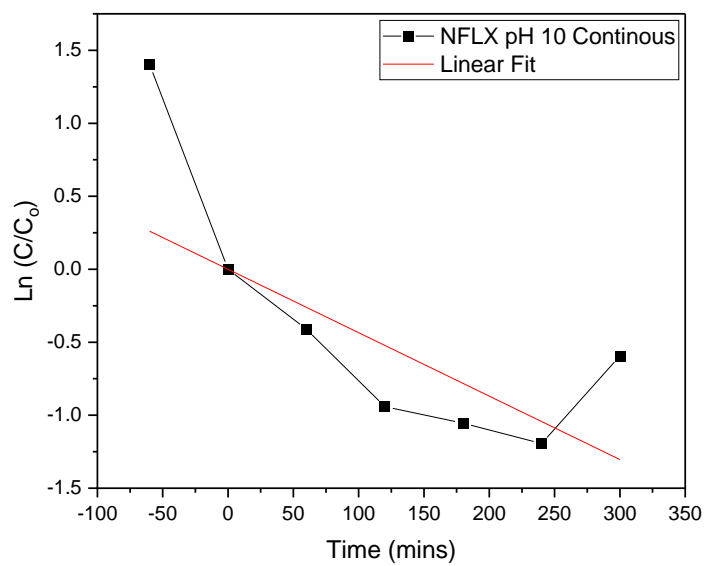

**Figure S20.** pH 10 Continuous light for NFLX sample linear fit

## Pulsed Width Modulation Setup

Pulse width modulation (PWM) with an Arduino Uno connected to an LED Current Driver was used to control the UV-LED (LED Engin, 1 A,  $\lambda = 365$  nm). This set-up digitally controls a square wave to switch between on (high, 5 volts) and off (low, 0 volts) for different time intervals. The length the LED is switch on at a time is called the pulse width. The dual frequency program switches between two pulse widths, 50Hz and 0.1Hz. Each frequency is repeated the number to times required so an equal amount of time is spent at each. The dual frequency PWM program was coded with the following script:

```
int ledPin = 9;

void setup() {
  pinMode(led, OUTPUT);
}

void loop()
{  digitalWrite(led, HIGH);
  delay(10000);
  digitalWrite(Pin, LOW);
  delay(10000);
  {
    For (int x = 0; x < 500; x++)
    {
      digitalWrite(led, HIGH);
      delay(20);
      digitalWrite(Pin, LOW);
      delay(20);
    }
  }
}
```
